# Supplementary material for: Unveiling the molecular basis of selective fluorination of SAM-dependent fluorinases
Source: Royal Society of Chemistry journal article supplement (doi:10.1039/d5sc00081e), 2025-01-01
Supplement: d5sc00081e1.pdf [file d5sc00081e1.pdf]

## Unveiling the molecular basis of selective fluorination of SAM-dependent fluorinases

Ravi Kumar Verma,<sup>‡a</sup> Wan Lin Yeo,<sup>‡b</sup> Elaine Tiong,<sup>‡c</sup> Ee Lui Ang,<sup>\*be</sup> Yee Hwee Lim,<sup>\*de</sup> Fong Tian Wong,<sup>\*cd</sup> and Hao Fan<sup>\*aef</sup>

- Bioinformatics Institute, Agency for Science, Technology and Research, 30 Biopolis Street, #07-01 Matrix Building, Singapore 138671, Republic of Singapore.
- Singapore Institute of Food and Biotechnology Innovation, Agency for Science, Technology and Research, 31 Biopolis Way, #04-01 Nanos, Singapore 138669, Republic of Singapore.
- Institute of Molecular and Cell Biology, Agency for Science, Technology and Research, 61 Biopolis drive, Proteos, Singapore 138673, Republic of Singapore.
- Institute of Sustainability for Chemicals, Energy and Environment, Agency for Science, Technology and Research, 8 Biomedical Grove, #07-01 Neuros Building, Singapore 138665, Republic of Singapore.
- Synthetic Biology Translational Research Program, Yong Loo Lin School of Medicine, National University of Singapore, 10 Medical Drive, Singapore 117597, Republic of Singapore.
- Department of Biochemistry, Yong Loo Lin School of Medicine, National University of Singapore, 8 Medical Drive, Singapore 117596, Republic of Singapore.

<sup>‡</sup>Authors contributed equally

\*Corresponding authors:

Ee Lui Ang email: [ang\\_ee\\_lui@sifbi.a-star.edu.sg](mailto:ang_ee_lui@sifbi.a-star.edu.sg)

Yee Hwee Lim email: [lim\\_yee\\_hwee@isce2.a-star.edu.sg](mailto:lim_yee_hwee@isce2.a-star.edu.sg)

Fong Tian Wong email: [wongft@imcb.a-star.edu.sg](mailto:wongft@imcb.a-star.edu.sg)

Hao Fan email: [hfan2006@gmail.com](mailto:hfan2006@gmail.com); [fanh@bii.a-star.edu.sg](mailto:fanh@bii.a-star.edu.sg)

**This PDF file includes:**

SI Text

Figs. S1 to S12

Tables S1 to S8

Legend for Movie S1 to S4

## SI Text

### Additional details on molecular dynamics simulations:

In the current study, OPLS4 all-atom force field (Lu *et al.*, 2022, *JCTC*) was used to model the entire system, including the protein, sodium, fluoride, chloride ions, and the cofactor S-Adenosylmethionine (SAM). OPLS4 improves accuracy for challenging chemistries, including drug-like chemical space with molecular ions and sulfur-containing moieties. It has been extensively benchmarked against experimental data, such as hydration free energies and ion-water interaction energies, showing strong agreement with observations. The choice of OPLS4 is further supported by its successful application in molecular dynamics (MD) simulations of the CLC family of chloride channels (McKiernan *et al.*, 2020, *PLoS Comput Biol.*) and Claudin-10a/-10b ion channels (Nagarajan *et al.*, 2024, *Int J Mol Sci.*). Consequently, we chose OPLS4 for its broad applicability to proteins and organic cofactors like SAM, and its reliable performance in modeling halide ions, ensuring robust representation of F<sup>-</sup> and Cl<sup>-</sup> interactions in the ion-binding site.

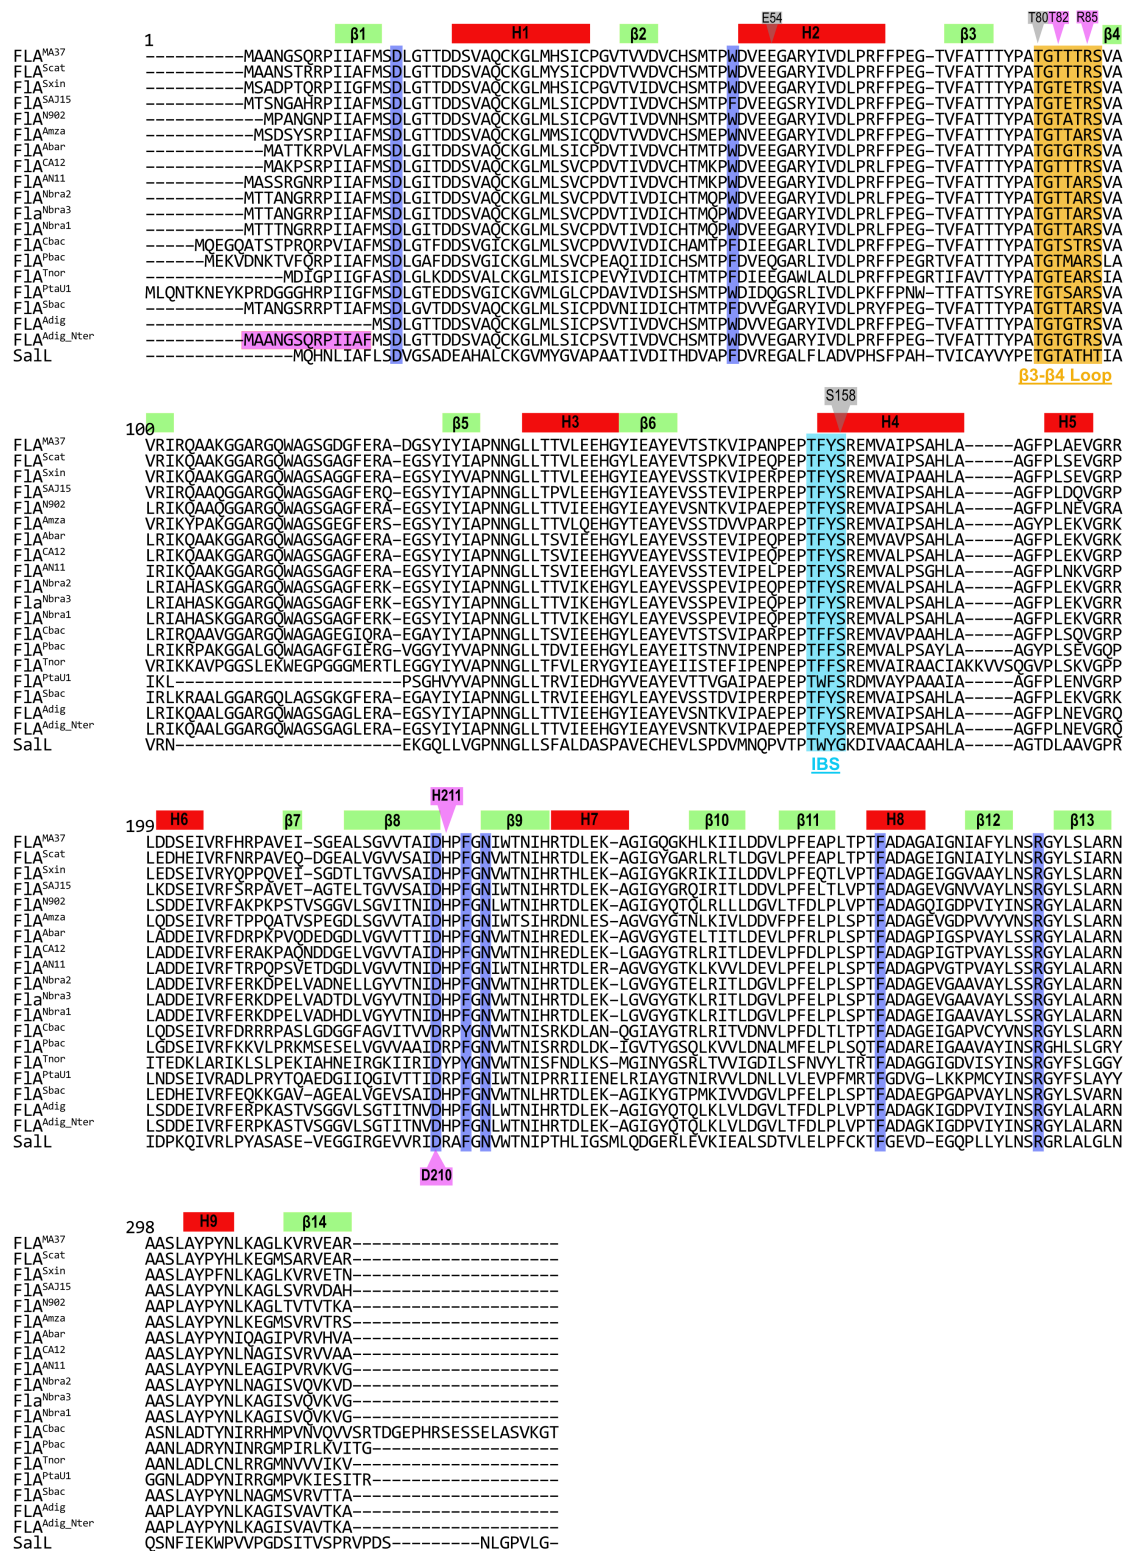

**Fig. S1:** Comparative sequence alignment of newly discovered fluorinases with previously characterized counterparts, with Sa1L chlorinase also included for reference.  $\beta$ -strand segments are shown in green, and helical segments in red. Residues constituting the IBS and IES are highlighted in cyan and orange boxes, respectively. Mutation sites are marked in magenta, while other key residues are indicated in grey. The seven SAM-interacting residues are indicated with a blue background.

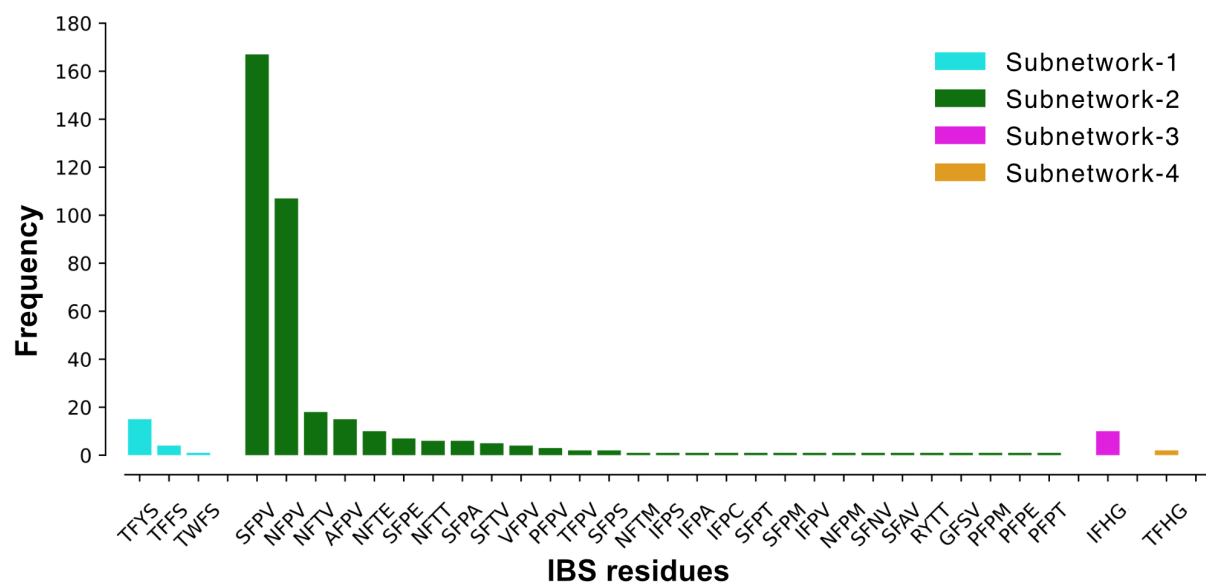

**Fig. S2:** Diversity and distribution of ion-binding site (IBS) across subnetwork 1-4 sequences.



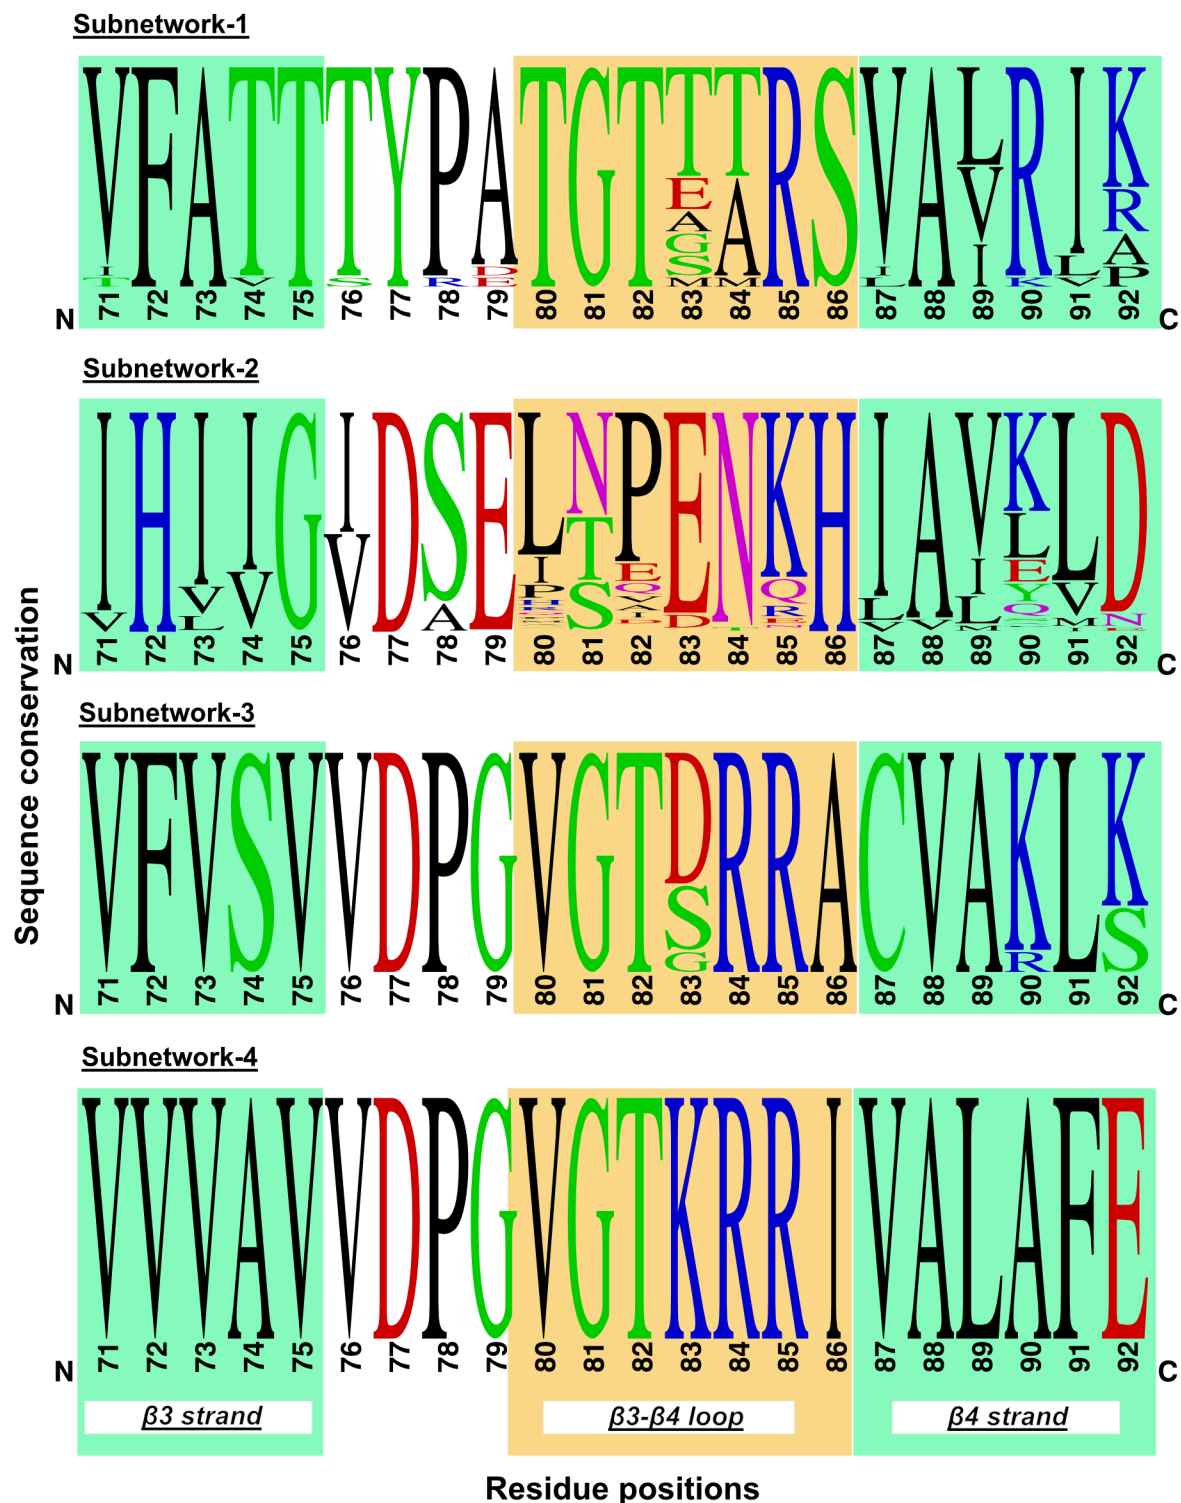

**Fig. S3:** Sequence conservation of region encompassing  $\beta$ 3 and  $\beta$ 4 stand in subnetworks 1-4.

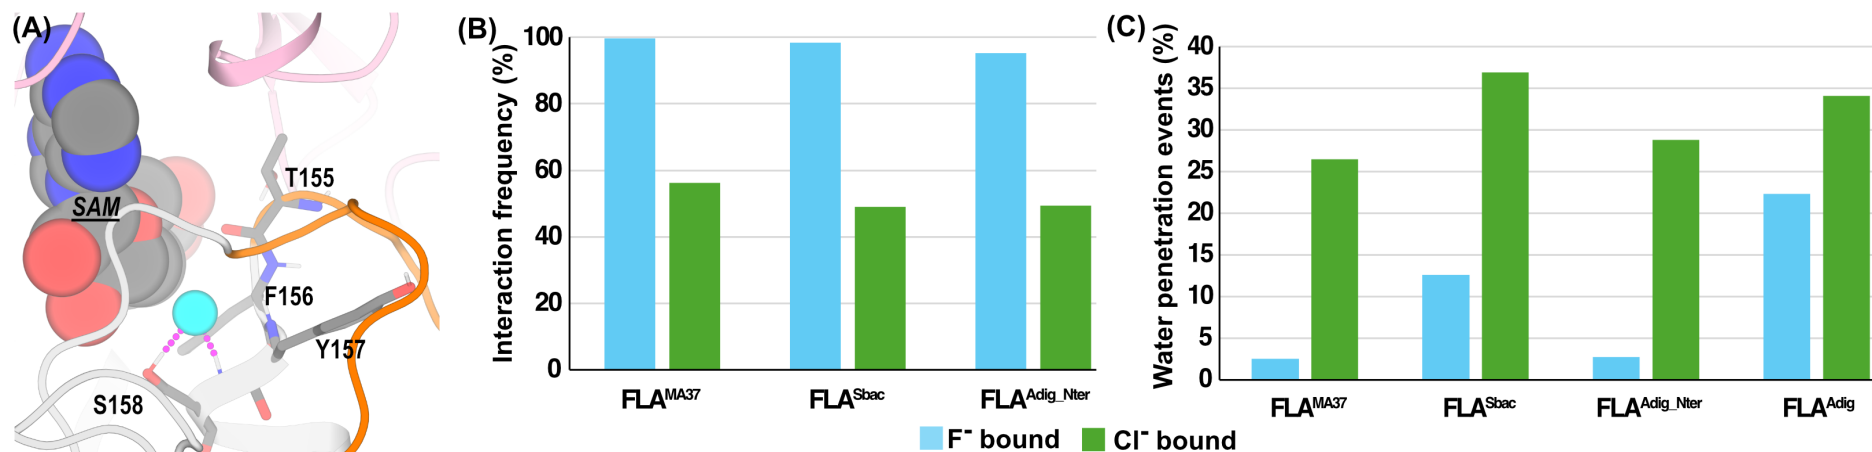

**Fig. S4:** (A) Interaction between the fluoride ion (cyan sphere) and the sidechain/backbone polar hydrogens of IBS residues in FLA<sup>Adig\_Nter</sup> and (B) Histogram showing interaction frequency between sidechain/backbone polar hydrogens of S158 and halide ion from MD simulation trajectories based on a minimum distance  $\leq 2.5 \text{ \AA}$  criterion. (C) Histograms showing increased water penetration events in chloride bound compared to fluoride bound trajectories. Water penetration into the IBS was counted using a minimum distance criterion of  $3.0 \text{ \AA}$  between the sidechain/backbone polar hydrogens of S158 in the IBS and water molecules.

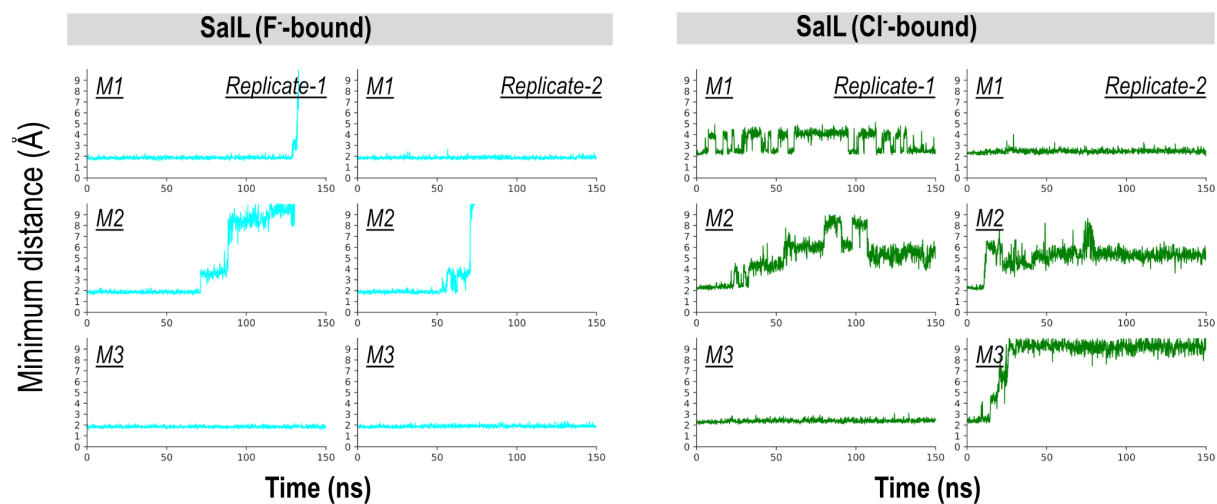

**Fig. S5:** Plots showing time-evolution of minimum distance between the sidechain and backbone polar hydrogens of S158 and the halide ion ( $F^- / Cl^-$ ) in the IBS in SalL chlorinase. The distances were plotted separately for each monomer.

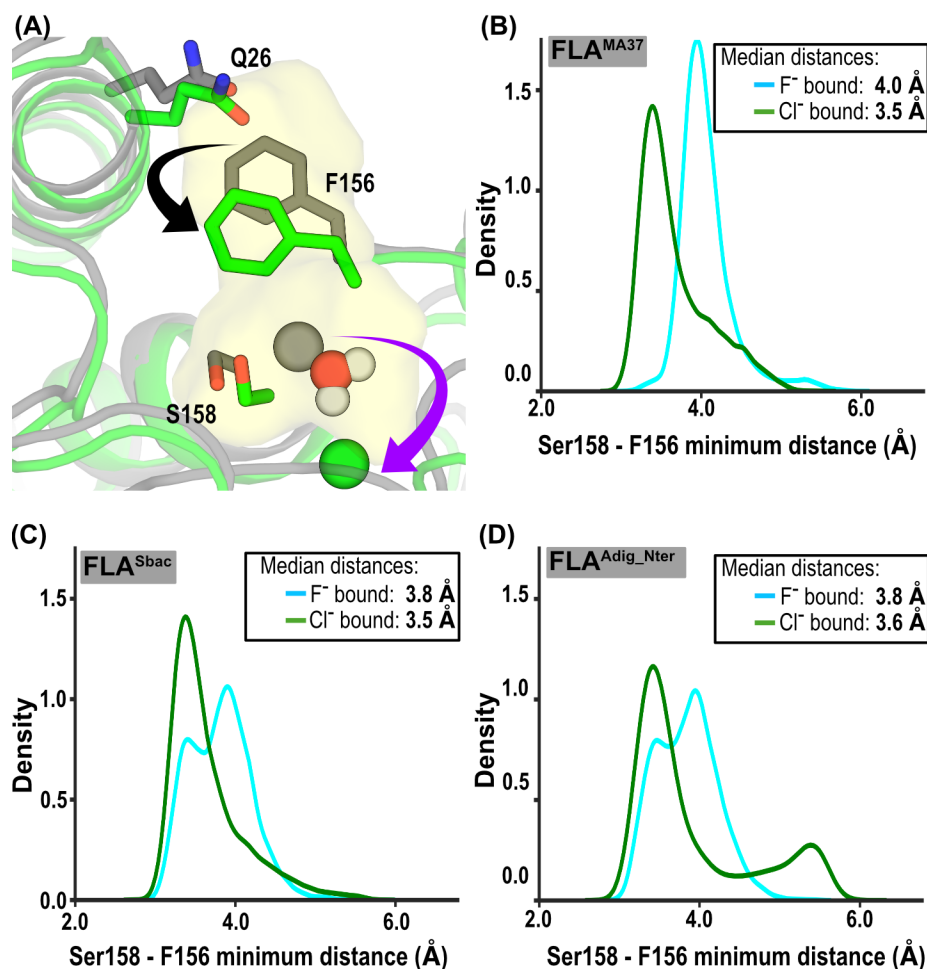

**Fig. S6:** (A) Representative frame from chloride bound FLA<sup>Sbac</sup> MD trajectory (green) showing the inward movement of IBS F156, compared to the initial MD-relaxed (grey) structure. The Q26 is shown for reference. The inward movement of F156 coupled with the water penetration in the IBS leads to release of bound chloride, shown as spheres, from the IBS. (B-D) The distributions of minimum distance between F156 and S158 within the ion-binding site in fluoride (cyan) and chloride (green) bound trajectories. The median value for the distributions is given in the box.

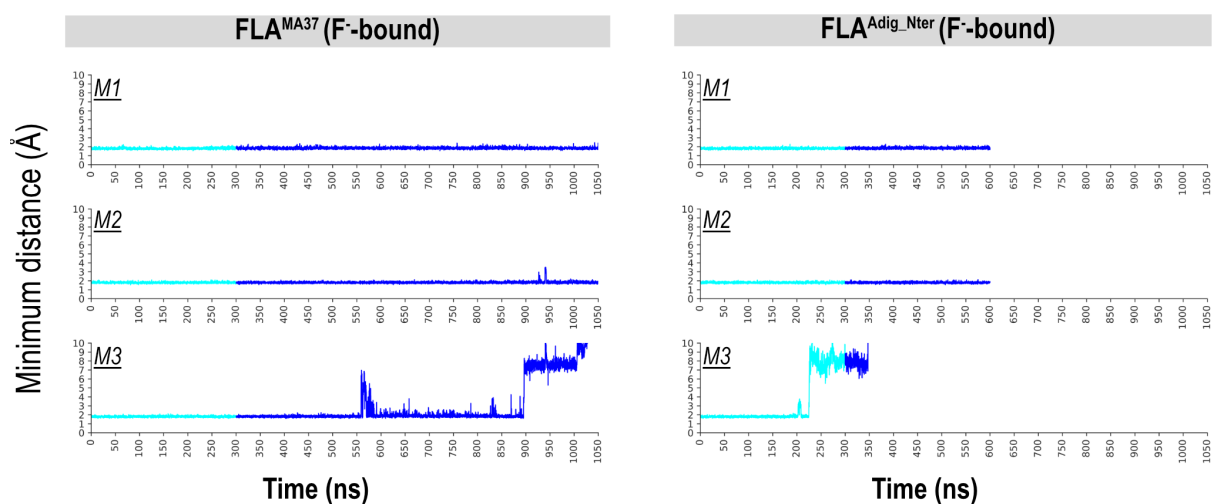

**Fig. S7:** Plots showing time-evolution of the minimum distance between the sidechain and backbone polar hydrogens of S158 in the IBS and the  $F^-$  ion in  $FLA^{MA37}$ , and  $FLA^{Adig\_Nter}$   $F^-$ -bound trajectories. Distances were plotted separately for each monomer. The distances from the initial 300 ns of MD simulation trajectories are represented in cyan, with the extended simulation period shown in blue. Notably, the  $F^-$  ion completely dissociates from monomer M3 in both cases.

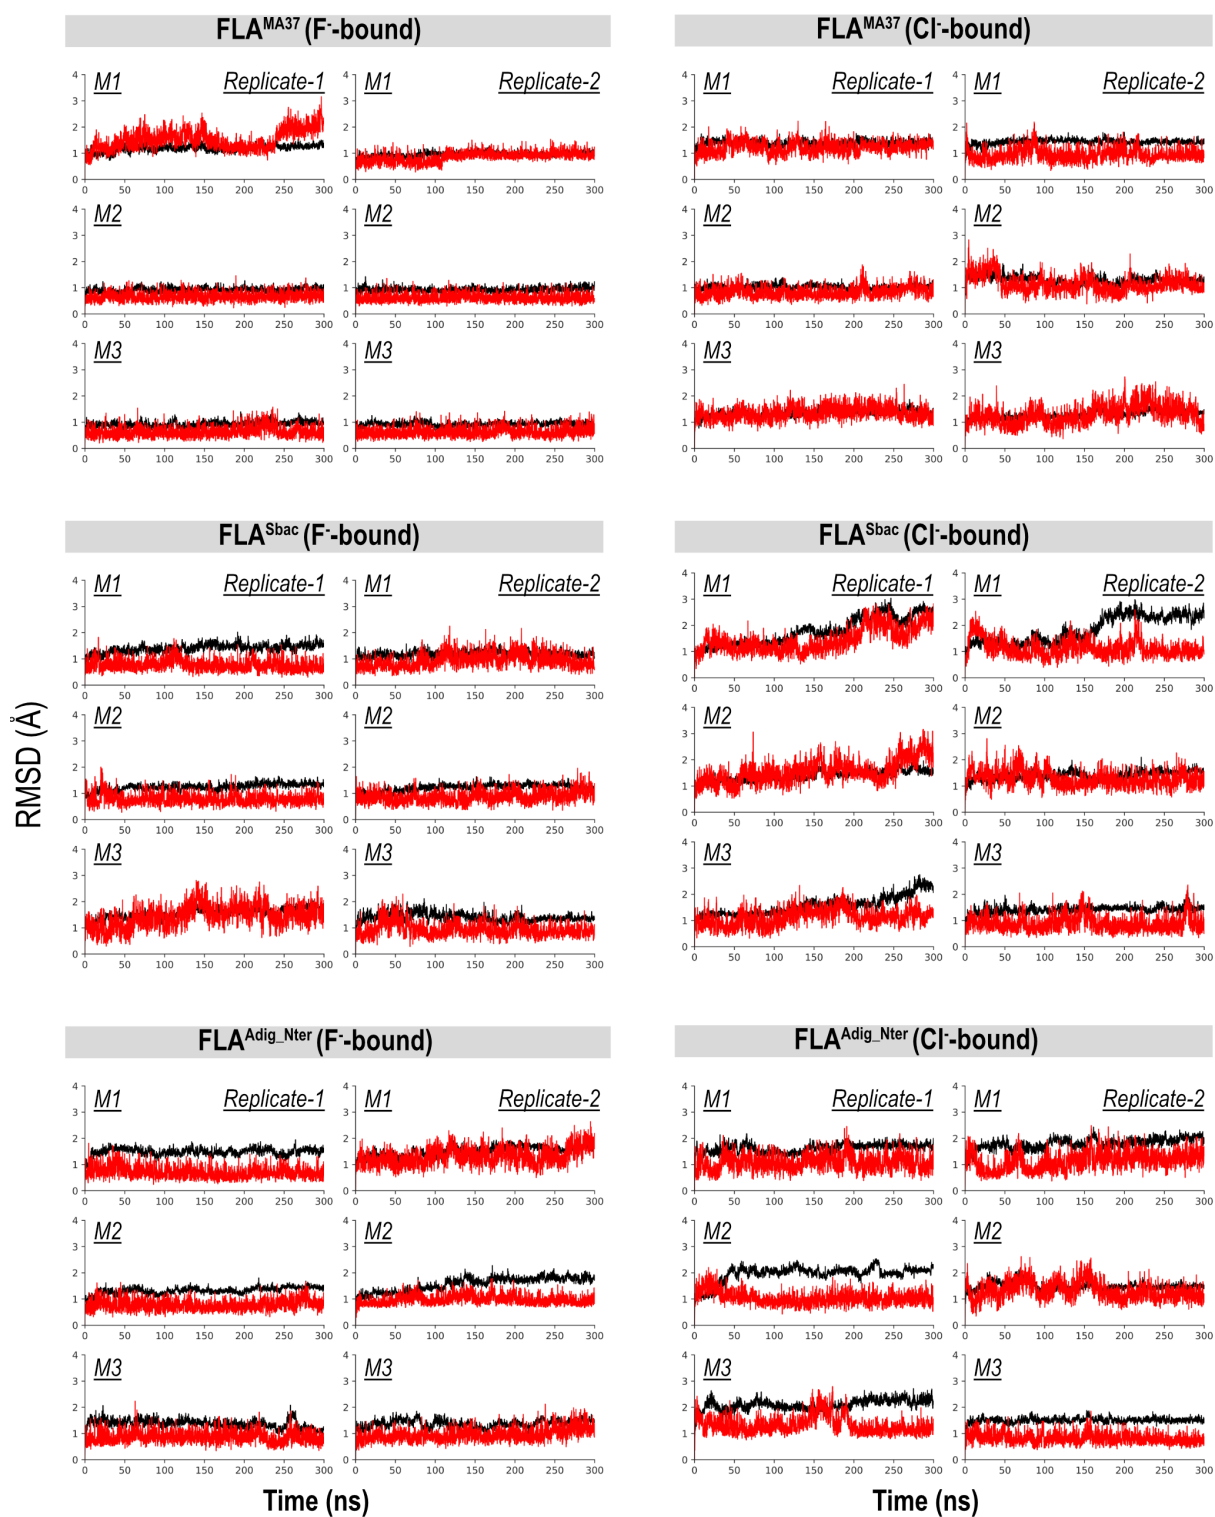

**Fig. S8:** RMSD plots for F<sup>-</sup>-bound and Cl<sup>-</sup>-bound trajectories of FLA<sup>MA37</sup>, FLA<sup>Sbac</sup>, and FLA<sup>Adig\_Nter</sup>. Two replicate MD simulations were conducted for each condition. The RMSDs of the protein Ca atom (black) and SAM heavy atoms (red) were plotted separately.

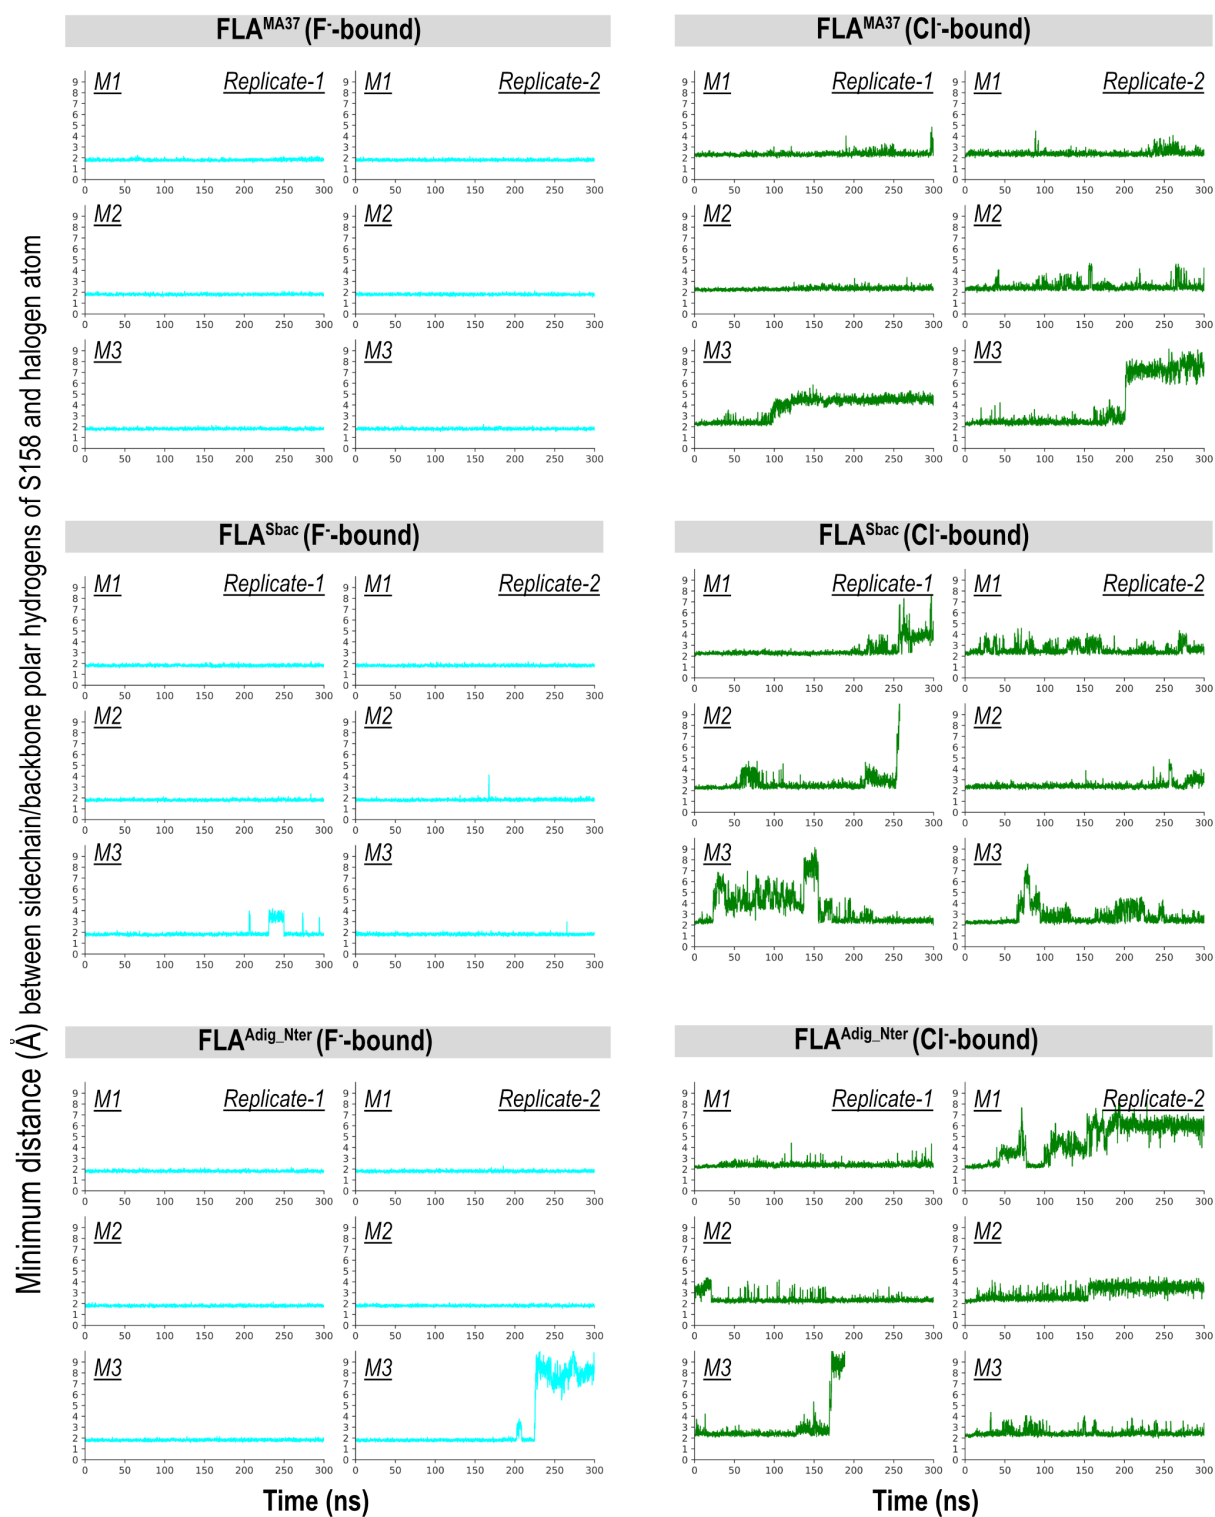

**Fig. S9:** Plots showing time-evolution of the minimum distance between the sidechain and backbone polar hydrogens of S158 in the IBS and the halide ion ( $F^-$  /  $Cl^-$ ) in  $FLA^{MA37}$ ,  $FLA^{Sbac}$ , and  $FLA^{Adig\_Nter}$ . Two replicate MD simulations were conducted for each condition. The distances were plotted separately for each monomer.

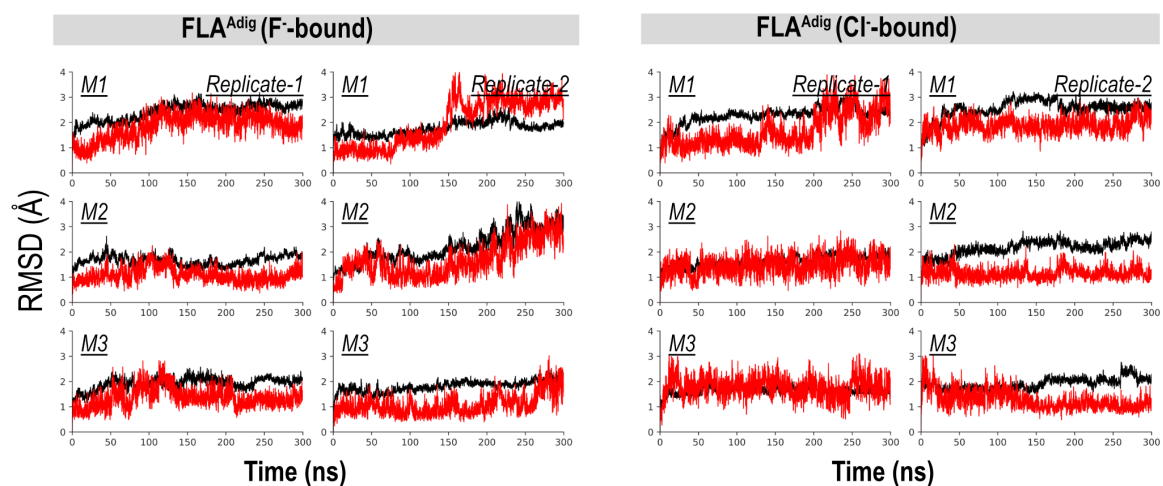

**Fig. S10:** RMSD plots for FLA<sup>Adig</sup>. Two replicate MD simulations were conducted for each condition. The RMSDs of the protein C $\alpha$  atom (black) and SAM heavy atoms (red) were plotted separately.



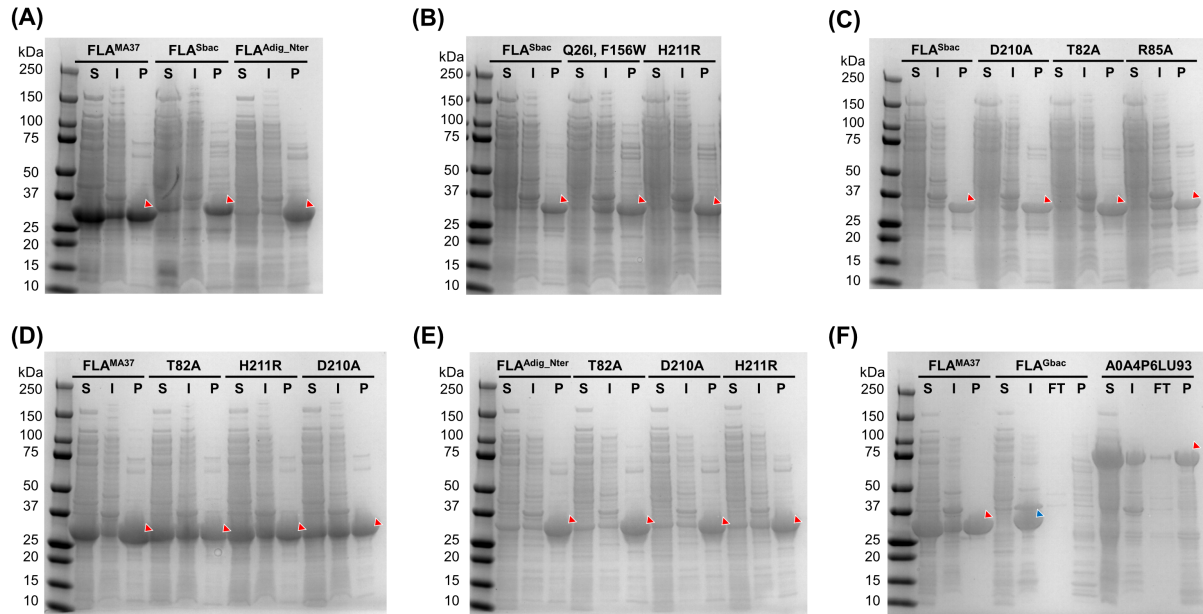

**Fig. S11:** Protein gels. (A) Wildtype fluorinases (FLA<sup>MA37</sup>, FLA<sup>Sbac</sup>, FLA<sup>Adig\_Nter</sup>), (B & C) FLA<sup>Sbac</sup> and its mutants, (D) FLA<sup>MA37</sup> and its mutants, (E) FLA<sup>Adig\_Nter</sup> and its mutants, (F) FLA<sup>MA37</sup> and two wildtype fluorinases that do not show fluorination (FLA<sup>Gbac</sup>, A0A4P6LU93).

S = soluble fractions of lysates, I = insoluble fractions of lysates (soluble and insoluble fractions' volume are normalized based on harvest OD), FT= Flow-through, P = purified proteins (25 µg). Red arrows indicated the purified proteins. Blue arrows indicated proteins stuck in insoluble fractions.

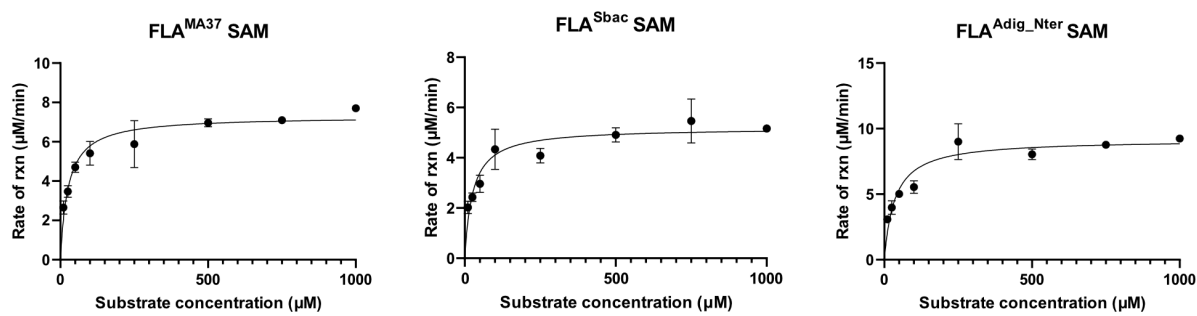

**Fig. S12:** Michaelis-Menten plots for FLA<sup>MA37</sup>, FLA<sup>Sbac</sup>, and FLA<sup>Adig\_Nter</sup> using SAM substrate, at 37 °C.

**Table S1:** List of subnetwork-1 members consisting of 16 previously identified known fluorinases and 4 newly identified putative fluorinases (highlighted in bold).

| Name                      | Uniprot ID     | Organism                                 | Max seq-identity to known fluorinases (%) | IBS residues |
|---------------------------|----------------|------------------------------------------|-------------------------------------------|--------------|
| <b>FLA<sup>Gbac</sup></b> | A0A7W1EMS4     | <i>Gemmatimonadaceae bacterium</i>       | 68.9                                      | TFFS         |
| <b>FLA<sup>Sbac</sup></b> | A0A7J9ZI22     | <i>Streptosporangiales bacterium</i>     | 78.8                                      | TFYS         |
| <b>FLA<sup>Adig</sup></b> | A0A7W7MQB5     | <i>Actinoplanes digitatis</i>            | 93.7                                      | TFYS         |
| <b>FLA<sup>Smor</sup></b> | A0A7Y7B3E7     | <i>Streptomyces morookaense</i>          | 97.9                                      | TFYS         |
|                           |                |                                          |                                           |              |
| FLA <sup>MA37</sup>       | W0W999         | <i>Streptomyces</i> sp. MA37             | -                                         | TFYS         |
| FLA <sup>Scat</sup>       | Q70GK9         | <i>Streptomyces cattleya</i>             | -                                         | TFYS         |
| FLA <sup>Sxin</sup>       | A0A068VNW5     | <i>Streptomyces xinghaiensis</i>         | -                                         | TFYS         |
| FLA <sup>SAJ15</sup>      | A0A7M3LZW5     | <i>Streptomyces</i> sp. SAJ15            | -                                         | TFYS         |
| FLA <sup>N902</sup>       | R4LHX8         | <i>Actinoplanes</i> sp. N902-109         | -                                         | TFYS         |
| FLA <sup>Amza</sup>       | A0A1G9FQX8     | <i>Actinopolyspora mzabensis</i>         | -                                         | TFYS         |
| FLA <sup>Abar</sup>       | A0A8H9J0C4     | <i>Amycolatopsis bartoniae</i>           | -                                         | TFYS         |
| FLA <sup>CA12</sup>       | WP_103354124.1 | <i>Amycolatopsis</i> sp. CA-128772       | -                                         | TFYS         |
| FLA <sup>AN11</sup>       | A0A5B2WM47     | <i>Goodfellowiella</i> sp. AN110305      | -                                         | TFYS         |
| FLA <sup>Nbra2</sup>      | WP_029901962.1 | <i>Nocardia brasiliensis</i> IFM 10847   | -                                         | TFYS         |
| FLA <sup>Nbra3</sup>      | A0A379BKP5     | <i>Nocardia brasiliensis</i> NCTC 11294  | -                                         | TFYS         |
| FLA <sup>Nbra1</sup>      | W8JNL4         | <i>Nocardia brasiliensis</i> ATCC 700358 | -                                         | TFYS         |
| FLA <sup>Cbac</sup>       | A0A535N3L3     | <i>Chloroflexi bacterium</i>             | -                                         | TFFS         |
| FLA <sup>Pbac</sup>       | A0A0J1FI89     | <i>Peptococcaceae bacterium</i> CEB3     | -                                         | TFFS         |
| FLA <sup>Tnor</sup>       | A0A1I4QPY6     | <i>Thermodesulforhabdus norvegica</i>    | -                                         | TFFS         |
| FLA <sup>PtaU1</sup>      | A0A1V5AZT2     | <i>Methanosaeta</i> sp. PtaU1.Bin055     | -                                         | TWFS         |

**Table S2:** HTP screening of fluorinase variants. Activity is given as fold comparison against FLA<sup>MA37</sup> for both fluorination and chlorination. His: 6xHis tag, SUMO: Small ubiquitin-like modifier protein, MBP: maltose binding protein, ompA: signal peptide of outer membrane protein A, Nter: N-terminal linker from FLA<sup>MA37</sup>. FLA<sup>Adig</sup> without N-terminal linker from FLA<sup>MA37</sup> has no activity.

| Gene                     | ID  | N-terminal | Fluorination | Chlorination |
|--------------------------|-----|------------|--------------|--------------|
| FLA <sup>Sbac</sup>      | 121 | His        | 0.3          | 0.07         |
|                          | 123 | His        | 0.25         | 0.05         |
|                          | 230 | His        | 0.25         | 0.06         |
|                          | 228 | SUMO       | 0.11         | 0            |
|                          | 236 | SUMO       | 0.17         | 0            |
|                          | 229 | MBP        | 0.01         | 0            |
|                          | 232 | MBP        | 0.01         | 0            |
|                          | 233 | MBP        | 0.01         | 0            |
|                          | 122 | OmpA       | 0.01         | 0            |
| FLA <sup>Adig_Nter</sup> | 260 | His+Nter   | 0.2          | 0.09         |
|                          | 261 | His+Nter   | 0.21         | 0.1          |
|                          | 262 | His+Nter   | 0.16         | 0.07         |

**Table S3:** List of putative fluorinases from subnetwork 2-4 selected for experimental testing.

| Subnetwork ID | Uniprot ID | Organism                            | Max seq-identity to known fluorinases (%) | IBS residues |
|---------------|------------|-------------------------------------|-------------------------------------------|--------------|
| 2             | A0A1K1LRM2 | Sinomicrobium oceani                | 28.68                                     | IFPA         |
|               | A0A2U3B478 | Flavobacteriaceae bacterium LYZ1037 | 25.77                                     | SFPA         |
|               | A0A329N229 | Sinomicrobium sp. N-1-3-6           | 27.91                                     | IFPC         |
|               | A0A1M5AXG9 | Arenibacter palladensis             | 27.13                                     | SFPE         |
|               | A0A1M5XYQ6 | Leeuwenhoeikiella palythoae         | 27.52                                     | NFTE         |
|               | A0A5C8V3H9 | Flagellimonas hymeniacidonis        | 29.46                                     | SFPM         |
|               | A0A1W6MHS0 | Nonlabens spongiae                  | 27.80                                     | NFTM         |
|               | A0A7Y6XTT1 | Flavobacteriaceae bacterium         | 26.61                                     | SFPS         |
|               | A0A3N0ES88 | Sinomicrobium pectinilyticum        | 27.91                                     | IFPS         |
|               | A0A1Z8AQI3 | Nonlabens dokdonensis               | 25.48                                     | NFTT         |
|               | A0A3B0BU82 | Ulvibacterium marinum               | 29.46                                     | PFPT         |
|               | A0A7K0E2T2 | Kriegella sp. EG-1                  | 27.52                                     | SFPT         |
|               | A0A432IJL1 | Flavobacteriia bacterium            | 26.46                                     | RYTT         |
|               | A0A497CI72 | Bacteroidetes bacterium             | 26.56                                     | SFAV         |
|               | A0A081DFQ2 | Nonlabens ulvanivorans              | 27.13                                     | NFTV         |
| 3             | A0A1C5UCQ3 | uncultured Clostridium sp.          | 27.21                                     | IFHG         |
|               | A0A1C5YEJ9 | uncultured Ruminococcus sp.         | 27.57                                     | IFHG         |
|               | A0A4P6LU93 | Blautia producta                    | 29.30                                     | IFHG         |
|               | C5EQ38     | Clostridiales bacterium 1_7_47FAA   | 28.52                                     | IFHG         |
| 4             | A0A2H5XU78 | Sinomicrobium oceani                | 27.48                                     | TFHG         |

**Table S4:** Predicted mutations and the screening results of fold comparison against the respective wild-type (WT) of FLA<sup>MA37</sup>, FLA<sup>Sbac</sup>, and FLA<sup>Adig\_Nter</sup>, in terms of F<sup>-</sup>/Cl<sup>-</sup> selectivity at 1.5 h reaction for both fluorination and chlorination activity. F<sup>-</sup>/Cl<sup>-</sup> selectivity = % conversion of fluorination reaction / % conversion of chlorination reaction. N.T. = Not tested

|       | Mutation location | F <sup>-</sup> /Cl <sup>-</sup> Selectivity |                     |                          |
|-------|-------------------|---------------------------------------------|---------------------|--------------------------|
|       |                   | FLA <sup>MA37</sup>                         | FLA <sup>Sbac</sup> | FLA <sup>Adig_Nter</sup> |
| WT    |                   | 11.53                                       | 10.43               | 8.65                     |
| H211R | Other             | 16.61                                       | 28.75               | 8.30                     |
| D210A | SAM-binding site  | ∞ <sup>#</sup>                              | 208.88              | ∞ <sup>#</sup>           |
| T82A  | Ion-egress site   | 22.33                                       | 10.49               | 12.67                    |
| R85A  | Ion-egress site   | N.T.                                        | ∞ <sup>\$</sup>     | N.T.                     |

<sup>#</sup> Fluorination and chlorination activity: 0.03-fold and 0.00-fold, respectively.

<sup>\$</sup> Fluorination and chlorination activity: 0.01-fold and 0.00-fold, respectively.

**Table S5:** Residue-wise binding free energies (kcal/mol) for IBS residues, computed from the MD-relaxed conformations using the Prime MMGBSA method. Atom-wise binding free energies were computed and subsequently aggregated to obtain residue-wise binding free energies.

| IBS residue | FLA <sup>MA37</sup>  |                       |            |  | FLA <sup>Sbac</sup>  |                       |            |  | FLA <sup>Adig_Nter</sup> |                       |            |
|-------------|----------------------|-----------------------|------------|--|----------------------|-----------------------|------------|--|--------------------------|-----------------------|------------|
|             | F <sup>-</sup> bound | Cl <sup>-</sup> bound | Difference |  | F <sup>-</sup> bound | Cl <sup>-</sup> bound | Difference |  | F <sup>-</sup> bound     | Cl <sup>-</sup> bound | Difference |
| T155        | -0.61                | -0.50                 | -0.11      |  | -0.28                | -0.57                 | 0.29       |  | -0.26                    | -0.11                 | -0.15      |
| F156        | -2.74                | -2.00                 | -0.74      |  | -2.57                | -1.19                 | -1.38      |  | -1.29                    | -0.32                 | -0.97      |
| Y157        | -2.36                | -1.64                 | -0.72      |  | -2.38                | -0.59                 | -1.79      |  | -1.43                    | 0.86                  | -2.29      |
| S158        | -2.87                | 2.09                  | -4.96      |  | -0.33                | 2.79                  | -3.12      |  | -3.21                    | 2.19                  | -5.40      |

**Table S6:** Kinetic ( $k_{\text{cat}}$  and  $K_{\text{M}}$ ) values for FLA<sup>MA37</sup>, FLA<sup>Sbac</sup>, and FLA<sup>Adig\_Nter</sup> using SAM substrate, at 37 °C.

| Variant                  | $K_{\text{M}}$ ( $\mu\text{M}$ ) | $k_{\text{cat}}$ ( $\text{min}^{-1}$ ) | $k_{\text{cat}}/K_{\text{M}}$ ( $\text{mM}^{-1} \text{min}^{-1}$ ) |
|--------------------------|----------------------------------|----------------------------------------|--------------------------------------------------------------------|
| FLA <sup>MA37</sup>      | $26.77 \pm 4.06$                 | $0.37 \pm 0.00$                        | $13.66 \pm 2.15$                                                   |
| FLA <sup>Sbac</sup>      | $26.82 \pm 7.41$                 | $0.26 \pm 0.02$                        | $10.04 \pm 1.90$                                                   |
| FLA <sup>Adig_Nter</sup> | $35.85 \pm 4.19$                 | $0.46 \pm 0.02$                        | $12.93 \pm 1.86$                                                   |



**Table S7:** Interaction frequency between SAM and protein residues. Residues positions where the interaction frequency difference >20% are shown in colour.

| Residues | F <sup>-</sup> bound trajectories |                                |            |  | Cl <sup>-</sup> bound trajectories |                                |            |
|----------|-----------------------------------|--------------------------------|------------|--|------------------------------------|--------------------------------|------------|
|          | FLA <sup>MA37</sup>               | FLA <sup>MA37_D210A</sup>      | Difference |  | FLA <sup>MA37</sup>                | FLA <sup>MA37_D210A</sup>      | Difference |
| ASN215   | 63.4                              | 40.8                           | 22.6       |  | 60.6                               | 47.5                           | 13.1       |
| ASP:21   | 98.0                              | 95.8                           | 2.2        |  | 92.7                               | 91.1                           | 1.6        |
| ASP:210  | 100.0                             | 0.0                            | 100.0      |  | 99.7                               | 0.0                            | 99.7       |
| ARG:270  | 73.6                              | 28.4                           | 45.2       |  | 75.3                               | 20.6                           | 54.7       |
| TRP:50   | 98.1                              | 98.8                           | -0.7       |  | 97.0                               | 84.9                           | 12.1       |
| PHE:213  | 96.1                              | 88.5                           | 7.6        |  | 94.1                               | 79.7                           | 14.4       |
| PHE:254  | 100.0                             | 96.5                           | 3.5        |  | 49.3                               | 79.7                           | -30.4      |
|          |                                   |                                |            |  |                                    |                                |            |
|          | FLA <sup>Sbac</sup>               | FLA <sup>Sbac_D210A</sup>      | Difference |  | FLA <sup>Sbac</sup>                | FLA <sup>Sbac_D210A</sup>      | Difference |
| ASN215   | 70.0                              | 55.5                           | 14.5       |  | 64.8                               | 47.7                           | 17.1       |
| ASP:21   | 100.0                             | 93.4                           | 6.6        |  | 97.3                               | 80.3                           | 17.0       |
| ASP:210  | 100.0                             | 0.0                            | 100.0      |  | 98.3                               | 0.0                            | 98.3       |
| ARG:270  | 98.0                              | 14.9                           | 83.1       |  | 79.3                               | 36.7                           | 42.6       |
| PHE:50   | 62.4                              | 71.5                           | -9.1       |  | 58.9                               | 63.0                           | -4.1       |
| PHE:213  | 92.2                              | 77.3                           | 14.9       |  | 93.5                               | 71.7                           | 21.8       |
| PHE:254  | 98.2                              | 89.6                           | 8.6        |  | 83.0                               | 88.9                           | -5.9       |
|          |                                   |                                |            |  |                                    |                                |            |
|          | FLA <sup>Adig_Nter</sup>          | FLA <sup>Adig_Nter_D211A</sup> | Difference |  | FLA <sup>Adig_Nter</sup>           | FLA <sup>Adig_Nter_D211A</sup> | Difference |
| ASN216   | 68.4                              | 48.4                           | 20.0       |  | 66.6                               | 58.6                           | 8.0        |
| ASP:21   | 100.0                             | 92.6                           | 7.4        |  | 99.5                               | 72.1                           | 27.4       |
| ASP:211  | 100.0                             | 0.0                            | 100.0      |  | 99.9                               | 0.0                            | 99.9       |
| ARG:271  | 63.5                              | 63.2                           | 0.3        |  | 68.1                               | 72.9                           | -4.8       |
| TRP:50   | 98.4                              | 98.4                           | 0.0        |  | 90.2                               | 51.6                           | 38.6       |
| PHE:214  | 96.0                              | 81.5                           | 14.5       |  | 92.5                               | 66.3                           | 26.2       |
| PHE:255  | 100.0                             | 97.9                           | 2.1        |  | 96.3                               | 97.6                           | -1.3       |

**Table S8:** Mutagenesis primers

| Primer ID | Description                         | Sequence (5' – 3')                |
|-----------|-------------------------------------|-----------------------------------|
| ppS130    | FLA <sup>Sbac_H210R</sup> (forward) | TTCCCAAACGGACGGTCAATCGCACTCACTT   |
| ppS131    | FLA <sup>Sbac_H210R</sup> (reverse) | AAGTGAGTGCGATTGACCGTCCGTTTGGGAA   |
| ppS315    | FLA <sup>MA37_T82</sup> (forward)   | TATCCCGCGACCGGCGCGACGACCCGCTCCGTG |
| ppS316    | FLA <sup>MA37_T82</sup> (reverse)   | CACGGAGCGGGTCGTCGCGCCGGTCGCGGGATA |
| ppS317    | FLA <sup>MA37_H211R</sup> (forward) | GTCACCGCGATCGACCGTCCCTTCGGCAACATC |
| ppS318    | FLA <sup>MA37_H211R</sup> (reverse) | GATGTTGCCGAAGGGACGGTCGATCGCGGTGAC |
| ppS319    | FLA <sup>MA37_D210A</sup> (forward) | GTCGTCACCGCGATCGCGCACCCCTTCGGCAAC |
| ppS320    | FLA <sup>MA37_D210A</sup> (reverse) | GATGTTGCCGAAGGGACGGTCGATCGCGGTGAC |

**Movie S1:** Inter-monomer interaction between H211 and T20 in FLA<sup>Sbac</sup>. The shorter side chain of histidine (H211) limits its interactions with threonine (T20), preventing it from interacting with E54. Salt-bridge or hydrogen bond interactions between these amino-acids are shown in dashed magenta line. SAM is shown in grey spheres.

**Movie S2:** Inter-monomer interaction between R211 and T20, and intra-monomer interaction between R211 and E54 in FLA<sup>Sbac\_H211R</sup>. The longer side chain of arginine (R211) in FLA<sup>Sbac\_H211R</sup> compared to histidine in FLA<sup>Sbac</sup>, enables it to form additional intra-monomer interactions with E54. Salt-bridge or hydrogen bond interactions between these residues are depicted by dashed magenta lines. SAM is shown in grey spheres.

**Movie S3:** Interaction network extending from R211 to F50 in FLA<sup>Sbac\_H211R</sup>. Salt-bridge or hydrogen bond interactions between these residues are depicted by dashed magenta lines. SAM is shown in grey spheres.

**Movie S4:** Release of the fluoride ion bound FLA<sup>Adig\_Nter</sup> trajectory. The IES forming  $\beta$ 3- $\beta$ 4 loop is shown in orange. Polar/charged residues in green. The IBS S158 is shown in grey. The fluoride ion (cyan) stabilizing interactions, with distances  $<2.5 \text{ \AA}$ , are shown in magenta.
